# Supplementary material for: Temperature-dependent properties of fat in adipose tissue from pork, beef and lamb. Part 1: microstructural, thermal, and spectroscopic characterisation
Source: Royal Society of Chemistry journal article supplement (doi:10.1039/d2fo00581f), 2022-01-01
Supplement: d2fo00581f1.pdf [file d2fo00581f1.pdf]

**Supplemental**

Supplemental Table 1: Main fatty acids found in the three back fats.

| <b>Fatty acids (%)</b> | <b>Pork</b> | <b>Beef</b> | <b>Lamb</b> |
|------------------------|-------------|-------------|-------------|
| C14:0                  | 1.5 ± 0.1   | 3.3 ± 0.1   | 3.0 ± 0.3   |
| C16:0                  | 23.4 ± 1.0  | 25.8 ± 0.8  | 22.1 ± 0.8  |
| C16:1n7                | 1.7 ± 0.5   | 3.1 ± 0.1   | 1.3 ± 0.3   |
| C18:0                  | 18.0 ± 0.2  | 16.5 ± 1.3  | 26.0 ± 5.1  |
| C18:1n9                | 38.4 ± 0.3  | 34.8 ± 2.1  | 25.3 ± 3.0  |
| C18:1n7                | 2.3 ± 0.1   | 1.7 ± 0.1   | 1.3 ± 0.2   |
| C18:2n6                | 9.0 ± 0.9   | 2.3 ± 0.5   | 4.7 ± 0.4   |
| Other                  | 5.7 ± 0.2   | 12.5 ± 2.3  | 16.3 ± 2.5  |

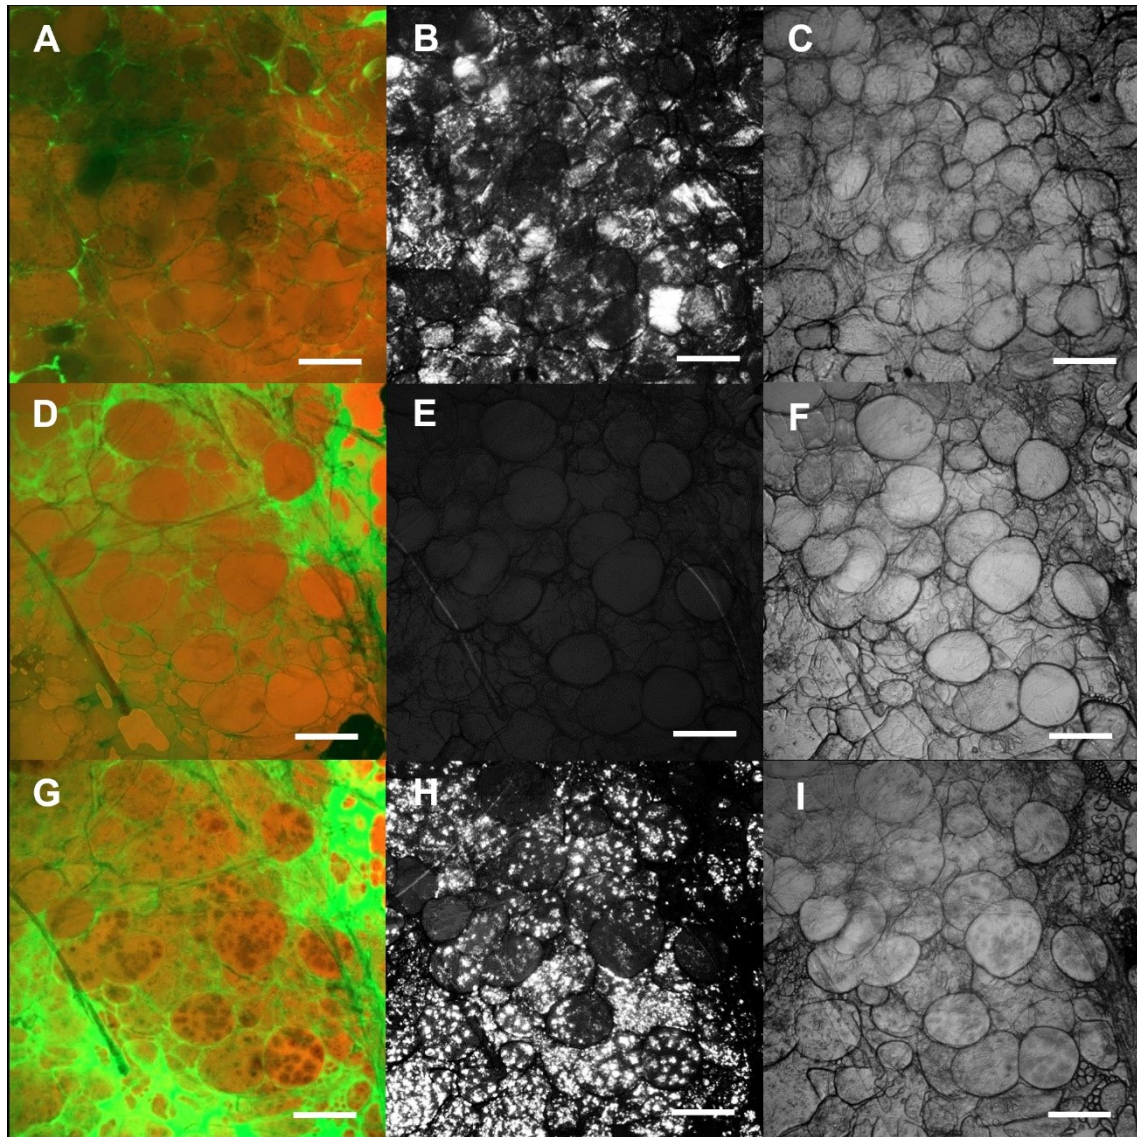

Supplemental Figure 1: CLSM imaging of beef adipose tissue at 20 °C (A-C), at 80 °C (D-F) and cooled back to 20 °C (G-I). The same field of view was imaged during temperature-cycling. Left column: fluorescence imaging with protein in green and fat phase in red; Central column: polarised light images; Right column: brightfield images. Scale bar = 200  $\mu\text{m}$ .



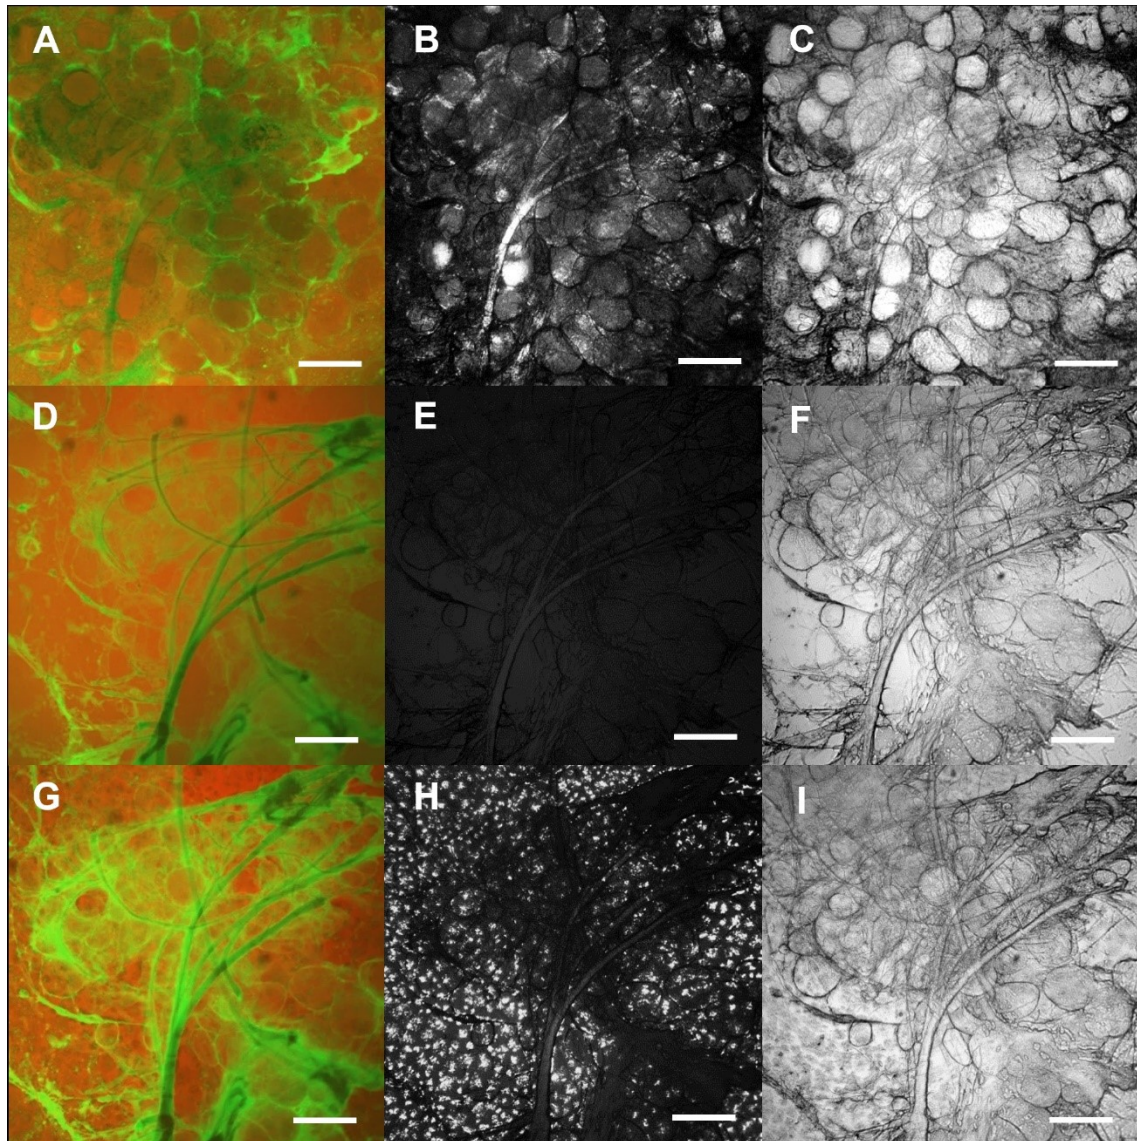

Supplemental Figure 2: CLSM imaging of lamb adipose tissue at 20 °C (A-C), at 80 °C (D-F) and cooled back to 20 °C (G-I). The same field of view was imaged during temperature-cycling. Left column: fluorescence imaging with protein in green and fat phase in red; Central column: polarised light images; Right column: brightfield images. Scale bar = 200  $\mu\text{m}$ .

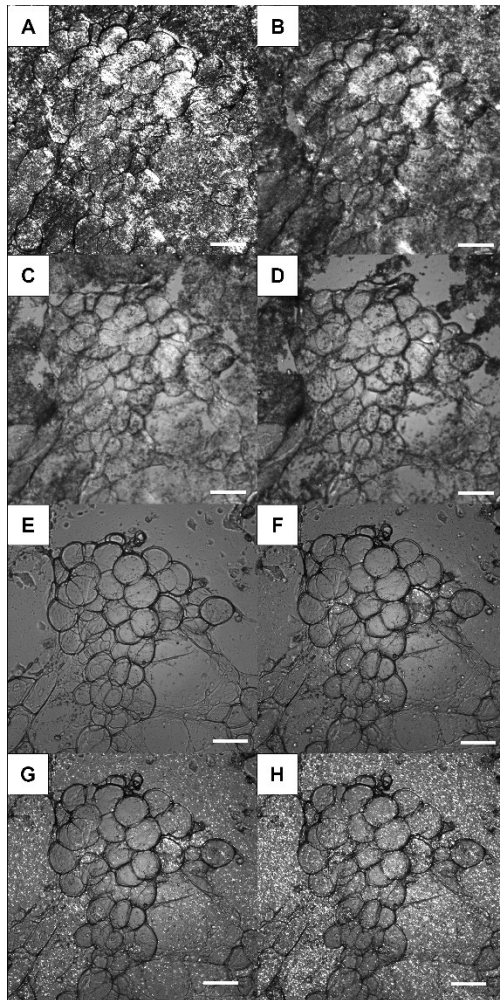

Supplemental Figure 3: PLM of PBF heated and cooled from 20 °C to 80 °C at 1 °C/min. The same field of view was imaged during the entire temperature cycle. Temperatures: A) 20 °C; B) 30 °C; C) 45 °C; D) 40 °C; E) 80 °C; and F) – H) 20 °C. Scale bar = 100  $\mu$ m.

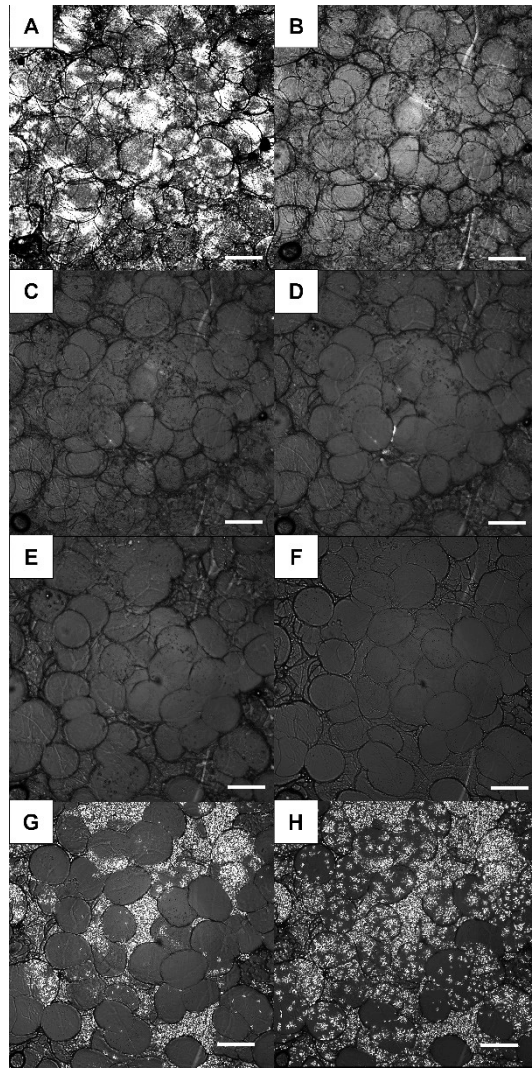

Supplemental Figure 4: PLM of BBF heated and cooled from 20 °C to 80 °C at 1 °C/min. The same field of view was imaged during the entire temperature cycle. Temperatures: A) 20 °C; B) 30 °C; C) 35 °C; D) 37 °C; E) 40 °C; F) 80 °C; G) 30 °C; and H) 20 °C. Scale bar = 100  $\mu$ m.

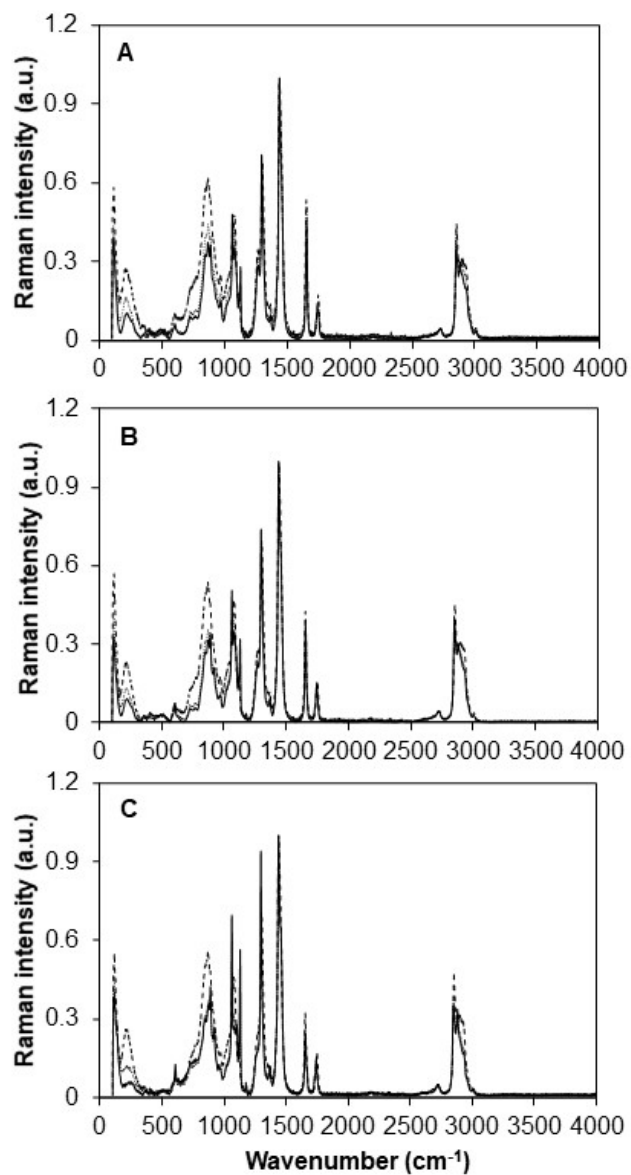

Supplemental Figure 5: Raman spectra of PBF (A), BBF (B), and LBF (C) in region 100 – 4000  $\text{cm}^{-1}$ . Spectra were initially collected at 20 °C (solid line), then at 80 °C following heating at 1 °C/min (dashed line) and then at 20 °C following a controlled cool at 1 °C/min (dotted line).
